# Supplementary material for: Distinct profiles of oxylipid mediators in liver, lung, and placenta after maternal nano-TiO2 nanoparticle inhalation exposure
Source: Royal Society of Chemistry journal article supplement (doi:10.1039/d2va00300g), 2023-01-01
Supplement: d2va00300g1.pdf [file d2va00300g1.pdf]

### Supplementary Materials

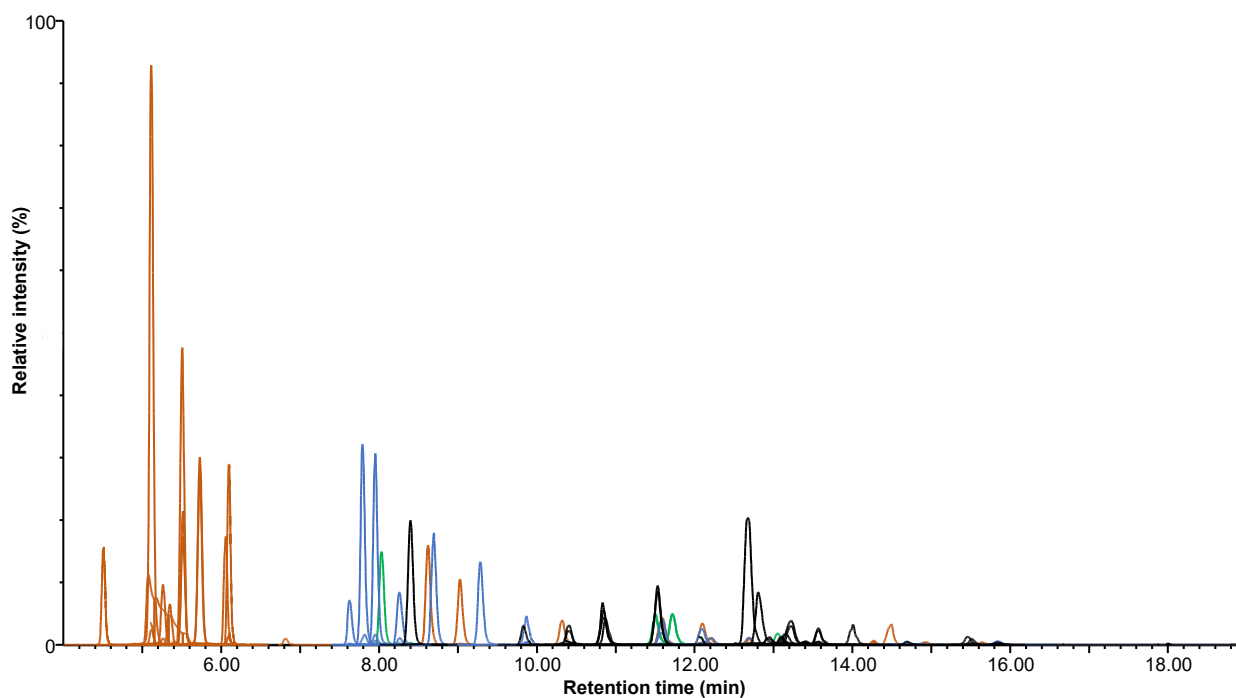

**Figure S1.** Representative LC-MS/MS chromatograph of a 100 ng/mL standard containing 56 oxylipins. Signals were acquired using multiple reaction monitoring (MRM) operating in ESI negative mode.

**Table S1.** Oxylipins monitored in this study. The table contains 68 compounds (including 12 internal standards), their precursor and product ions, the optimized cone and collision energies, as well as retention time and the respective internal standard for matrix effect correction.

| Analyte                     | Internal Standard    | Precursor Ion<br>(m/z) | Product Ion<br>(m/z) | Cone (V) | CE (V) | RT (min) |
|-----------------------------|----------------------|------------------------|----------------------|----------|--------|----------|
| PGE <sub>2</sub>            | d14-PGE <sub>2</sub> | 351.4                  | 271.5                | 30.0     | 15.0   | 5.0      |
| d4-PGE <sub>2</sub>         | -                    | 355.5                  | 275.4                | 10.0     | 15.0   | 5.0      |
| PGD <sub>2</sub>            | d14-PGE <sub>2</sub> | 351.2                  | 271.3                | 20.0     | 15.0   | 5.2      |
| d4-PGF <sub>2α</sub>        | -                    | 357.3                  | 197.3                | 55.0     | 25.0   | 4.8      |
| PGF <sub>2α</sub>           | d14-PGE <sub>2</sub> | 353.4                  | 193.3                | 70.0     | 25.0   | 4.8      |
| 6-keto-PGF <sub>1α</sub>    | d14-PGE <sub>2</sub> | 369.4                  | 163.4                | 50.0     | 25.0   | 4.1      |
| TBX2                        | d4-TBX2              | 369.1                  | 168.9                | 10.0     | 15.0   | 4.6      |
| d4-TBX2                     | -                    | 373.3                  | 199.3                | 20.0     | 15.0   | 4.6      |
| 8,9-EET                     | d11-11,12-EET        | 319.5                  | 155.1                | 50.0     | 10.0   | 15.9     |
| 11,12-EET                   | d11-11,12-EET        | 319.1                  | 167.2                | 40.0     | 15.0   | 15.3     |
| d11-11,12-EET               | -                    | 330.2                  | 167.1                | 30.0     | 10.0   | 15.3     |
| 14,15-EET                   | d11-11,12-EET        | 319.4                  | 219.3                | 30.0     | 10.0   | 14.8     |
| 8,9-DHET                    | d11-14,15-DHET       | 337.3                  | 127.2                | 20.0     | 20.0   | 9.4      |
| 11,12-DHET                  | d11-14,15-DHET       | 337.4                  | 167.4                | 25.0     | 15.0   | 8.8      |
| 14,15-DHET                  | d11-14,15-DHET       | 337.4                  | 207.2                | 25.0     | 15.0   | 8.2      |
| d11-14,15-DHET              | -                    | 348.5                  | 207.4                | 25.0     | 15.0   | 8.1      |
| 5-Iso-PGF <sub>2α</sub> -VI | d4-PGF2a             | 353.0                  | 115.0                | 50.0     | 20.0   | 4.8      |
| 5-HETE                      | d8-15-HETE           | 319.3                  | 257.5                | 40.0     | 10.0   | 14.0     |
| 8-HETE                      | d8-15-HETE           | 319.2                  | 155.2                | 30.0     | 10.0   | 13.6     |
| 9-HETE                      | d8-15-HETE           | 319.3                  | 151.3                | 20.0     | 15.0   | 13.3     |
| 11-HETE                     | d8-15-HETE           | 319.2                  | 167.2                | 20.0     | 15.0   | 13.2     |
| 12-HETE                     | d8-15-HETE           | 319.2                  | 179.2                | 25.0     | 20.0   | 12.8     |
| 15-HETE                     | d8-15-HETE           | 319.4                  | 219.2                | 10.0     | 10.0   | 12.2     |
| d8-15-HETE                  | -                    | 327.3                  | 182.6                | 15.0     | 15.0   | 12.2     |
| 20-HETE                     | d6-20-HETE           | 319.3                  | 275.3                | 50.0     | 15.0   | 10.4     |
| d6-20-HETE                  | -                    | 325.3                  | 281.4                | 35.0     | 15.0   | 10.4     |
| 5-oxoETE                    | d8-15-HETE           | 317.7                  | 203.2                | 50.0     | 20.0   | 15.5     |
| 15-oxoETE                   | d8-15-HETE           | 317.2                  | 113.1                | 20.0     | 15.0   | 12.9     |

|                 |                      |       |       |      |      |      |
|-----------------|----------------------|-------|-------|------|------|------|
| Lipoxin A4      | d4-LKB4              | 351.2 | 115.2 | 30.0 | 15.0 | 5.6  |
| LKB4            | d4-LKB4              | 335.2 | 195.3 | 40.0 | 15.0 | 7.3  |
| d4-LKB4         | -                    | 339.4 | 197.2 | 40.0 | 15.0 | 7.3  |
| LXD4            | d4-LKB4              | 495.3 | 177.3 | 60.0 | 20.0 | 5.5  |
| 9,10-EpOME      | d4-9,10-EpOME        | 295.3 | 171.1 | 55.0 | 15.0 | 14.5 |
| d4-9,10-EpOME   | -                    | 299.2 | 172.3 | 60.0 | 15.0 | 14.4 |
| 12,13-EpOME     | d4-9,10-EpOME        | 295.3 | 195.2 | 45.0 | 15.0 | 14.2 |
| 9,10-DiHOME     | d4-12,13-diHOME      | 313.3 | 201.2 | 30.0 | 20.0 | 7.9  |
| 12,13-DiHOME    | d4-12,13-diHOME      | 313.3 | 183.3 | 60.0 | 20.0 | 7.5  |
| d4-12,13-DiHOME | -                    | 317.1 | 185.3 | 40.0 | 20.0 | 7.5  |
| 9-HODE          | d4-9-HODE            | 295.3 | 171.3 | 30.0 | 15.0 | 11.3 |
| d4-9-HODE       | -                    | 299.2 | 172.3 | 35.0 | 15.0 | 11.2 |
| 13-HODE         | d4-9-HODE            | 295.3 | 195.2 | 50.0 | 15.0 | 11.1 |
| 9-oxoODE        | d3-9-oxoODE          | 293.4 | 185.2 | 40.0 | 20.0 | 12.7 |
| d3-9-oxoODE     | -                    | 296.3 | 296.5 | 50.0 | 20.0 | 12.5 |
| 7,8-DPE         | d11-11,12-EET        | 343.1 | 189.3 | 15.0 | 10.0 | 14.6 |
| 16,17-DPE       | d11-11,12-EET        | 343.2 | 233.2 | 20.0 | 10.0 | 13.9 |
| 19,20-DPE       | d11-11,12-EET        | 343.3 | 281.3 | 25.0 | 10.0 | 13.4 |
| 7,8-DiHDPA      | d11-14,15-DHET       | 361.2 | 113.3 | 40.0 | 15.0 | 9.8  |
| 16,17-DiHDPA    | d11-14,15-DHET       | 361.2 | 233.2 | 40.0 | 15.0 | 8.6  |
| 19,20-DiHDPA    | d11-14,15-DHET       | 361.4 | 273.4 | 25.0 | 15.0 | 8.2  |
| 4-HDHA          | d8-15-HETE           | 343.0 | 101.1 | 20.0 | 15.0 | 14.5 |
| 14-HDHA         | d8-15-HETE           | 343.3 | 281.5 | 10.0 | 10.0 | 12.8 |
| 16-HDHA         | d8-15-HETE           | 343.5 | 233.3 | 15.0 | 10.0 | 12.2 |
| 17-HDHA         | d8-15-HETE           | 343.4 | 281.3 | 20.0 | 10.0 | 11.9 |
| 20-HDHA         | d6-20-HETE           | 343.0 | 240.9 | 20.0 | 10.0 | 11.7 |
| Resolvin D1     | d4-LKB4              | 375.0 | 141.0 | 20.0 | 15.0 | 5.5  |
| PGE3            | d14-PGE <sub>2</sub> | 349.0 | 269.0 | 20.0 | 15.0 | 4.6  |
| 8,9-EpETE       | d11-11,12-EET        | 317.2 | 255.4 | 45.0 | 10.0 | 13.5 |
| 11,12-EpETE     | d11-11,12-EET        | 317.3 | 167.4 | 15.0 | 10.0 | 13.2 |
| 14,15-EpETE     | d11-11,12-EET        | 319.4 | 219.3 | 30.0 | 10.0 | 13.0 |
| 8,9-DiHETE      | d11-14,15-DHET       | 335.2 | 127.1 | 30.0 | 20.0 | 7.7  |
| 11,12-DiHETE    | d11-14,15-DHET       | 335.2 | 167.1 | 30.0 | 15.0 | 7.4  |
| 14,15-DiHETE    | d11-14,15-DHET       | 335.3 | 207.2 | 30.0 | 15.0 | 7.3  |

|         |            |       |       |      |      |      |
|---------|------------|-------|-------|------|------|------|
| 5-HEPE  | d8-15-HETE | 317.3 | 5.5   | 10.0 | 10.0 | 11.6 |
| 8-HEPE  | d8-15-HETE | 317.4 | 155.2 | 30.0 | 10.0 | 10.9 |
| 12-HEPE | d8-15-HETE | 317.2 | 179.3 | 10.0 | 10.0 | 11.0 |
| 15-HEPE | d8-15-HETE | 317.2 | 219.4 | 10.0 | 10.0 | 10.5 |
| 18-HEPE | d6-20-HETE | 317.0 | 215.0 | 20.0 | 10.0 | 9.9  |

**Table S2.** Analyte validation parameters, including linearity, sensitivity (LOD/LOQ) as expressed in vial concentration (ng/mL).

| Analyte        | Linearity (R <sup>2</sup> ) | LOD (ng/mL) | LOQ (ng/mL) |
|----------------|-----------------------------|-------------|-------------|
| PGE2           | 0.997                       | 0.008       | 0.027       |
| PGD2           | 0.984                       | 0.010       | 0.035       |
| PGF2A          | 0.994                       | 0.031       | 0.105       |
| TXB2           | 0.996                       | 0.034       | 0.114       |
| 8,9-EET        | 0.988                       | 23.8**      | 35.4**      |
| 11,12-EET      | 0.987                       | 3.41        | 11.4        |
| 14,15-EET      | 0.997*                      | 0.350       | 1.16        |
| 8,9-EET        | 0.988                       | 0.510       | 1.70        |
| 11,12-DHET     | 0.985                       | 0.019       | 0.062       |
| 8,9-DHET       | 0.999                       | 0.022       | 0.075       |
| 14,15-DHET     | 0.989                       | 0.183       | 0.609       |
| 5-Iso-PGF2a-VI | 0.997                       | 10.9**      | 33.0**      |
| 5-HETE         | 0.991                       | 0.060       | 0.201       |
| 8-HETE         | 0.977                       | 0.049       | 0.163       |
| 9-HETE         | 0.995                       | 14.5**      | 43.9**      |
| 11-HETE        | 0.973                       | 0.063       | 0.209       |
| 12-HETE        | 0.996                       | 0.925       | 3.09        |
| 15-HETE        | 0.994                       | 0.077       | 0.257       |
| 20-HETE        | 0.999                       | 0.909       | 3.03        |
| 5-OxoETE       | 0.992                       | 24.4**      | 73.8**      |
| 15-OxoETE      | 0.985                       | 20.0**      | 60.6**      |
| 6-keto-PGF1a   | 0.991                       | 19.2**      | 58.3**      |
| Lipoxin A4     | 0.997*                      | 0.018       | 0.060       |
| LKB4           | 0.976                       | 0.180       | 0.600       |
| LKD4           | 0.990*                      | 1.03        | 3.34        |

|              |        |        |        |
|--------------|--------|--------|--------|
| 9,10-EpOME   | 0.986  | 0.219  | 0.729  |
| 12,13-EpOME  | 0.993  | 0.435  | 1.45   |
| 9,10-DiHOME  | 0.993  | 0.075  | 0.250  |
| 12,13-DiHOME | 0.997  | 0.073  | 0.242  |
| 9-HODE       | 0.996  | 0.047  | 0.156  |
| 13-HODE      | 0.986  | 0.04   | 0.135  |
| 9-OxoODE     | 0.987  | 0.130  | 0.434  |
| 7,8-DPE      | 0.945* | 0.684  | 2.28   |
| 16,17-DPE    | 0.990* | 0.390  | 1.30   |
| 19,20-DPE    | 0.942* | 0.123  | 0.411  |
| 7,8-DiHDPE   | 0.999* | 0.125  | 0.416  |
| 16,17-DiHDPE | 0.998* | 0.025  | 0.084  |
| 19,20-DiHDPE | 0.993  | 0.091  | 0.302  |
| 4-HDHA       | 0.991* | 33.5** | 102**  |
| 14-HDHA      | 0.985  | 0.065  | 0.217  |
| 16-HDHA      | 0.994  | 0.029  | 0.097  |
| 17-HDHA      | 0.996* | 0.094  | 0.313  |
| 20-HDHA      | 0.989  | 15.4** | 46.7** |
| Resolvin D1  | 0.996* | 10.1** | 30.7** |
| PGE3         | 0.990* | 16.1   | 53.5   |
| 8,9-EpETE    | 0.996* | 185    | 618    |
| 11,12-EpETE  | 0.992* | 108    | 361    |
| 14,15-EpETE  | 0.995* | 80.6   | 269    |
| 8,9-DiHETE   | 0.997* | 39.3   | 131    |
| 11,12-DiHETE | 0.998* | 14.1   | 47.1   |
| 14,15-DiHETE | 0.999* | 13.8   | 46.0   |
| 5-HEPE       | 0.976  | 13.2   | 43.9   |
| 8-HEPE       | 0.994* | 20.5   | 68.5   |
| 12-HEPE      | 0.988  | 163    | 545    |
| 15-HEPE      | 0.996* | 37.9   | 126    |
| 18-HEPE      | 0.999  | 12.4** | 37.5** |

\*Linearity was calculated using oxylipin standards in methanol rather than the endogenous oxylipin response from the intrastudy control, since these lipids fell below the LOD in the sample.

\*\*The LODs and LOQs were calculated based on the standard deviation of a standard curve of pure oxylipins in methanol.

**Table S3.** Absolute percent recovery calculated using the mass labelled oxylipin internal standards. Recovery and standard deviations were obtained in duplicate analysis in a liver and placental matrix, comparing the LC-MS/MS peak areas of samples spiked in internal standards prior to homogenization and extraction vs. a sample spiked after extraction.

| Analyte              | Recovery $\pm$ Std Dev (%) |
|----------------------|----------------------------|
| d14-PGE <sub>2</sub> | 72.7 $\pm$ 7.6             |
| d4-PGF2a             | 83.2 $\pm$ 9.7             |
| d4-TXB <sub>2</sub>  | 68.8 $\pm$ 9.9             |
| d11-11-EET           | 79.4 $\pm$ 42.3            |
| d8-14,DHET           | 83.6 $\pm$ 11.3            |
| d8-15-HETE           | 71.2 $\pm$ 16.7            |
| d6-20-HETE           | 74.3 $\pm$ 26.1            |
| d4-LKB4              | 95.5 $\pm$ 30.3            |
| d4-9,10-EpOME        | 80.9 $\pm$ 19.3            |
| d4-12,13-diHOME      | 95.5 $\pm$ 42.5            |
| d4-9-HODE            | 73.7 $\pm$ 25.1            |
| d3-9-oxoODE          | 69.9 $\pm$ 20.8            |

**Table S4.** Oxylipid concentrations in liver tissues (ng/gram tissue).

|           | L1               | L2               | L3               | L4               | L5               | L6               | L7               | L8    | L9    | L10   | L11   | L12   | L13   |
|-----------|------------------|------------------|------------------|------------------|------------------|------------------|------------------|-------|-------|-------|-------|-------|-------|
|           | TiO <sub>2</sub> | TiO <sub>2</sub> | TiO <sub>2</sub> | TiO <sub>2</sub> | TiO <sub>2</sub> | TiO <sub>2</sub> | TiO <sub>2</sub> | Air   | Air   | Air   | Air   | Air   | Air   |
| 9-oxoODE  | 9.56             | 14.04            | 12.87            | 9.59             | 6.52             | 9.99             | 5.68             | 12.24 | 8.5   | 6.99  | 11.95 | 7.45  | 6.79  |
| 9-EpOME   | 60.46            | 60.71            | 60.52            | 55.85            | 44.75            | 60.2             | 25.43            | 69.65 | 53.2  | 18.03 | 71.11 | 46.53 | 41.91 |
| 9-HODE    | 53.33            | 60.76            | 65.08            | 63.91            | 49.63            | 62.53            | 33.45            | 59.91 | 51.31 | 16.64 | 76.46 | 42.27 | 51.89 |
| 13-HODE   | 45.5             | 46.07            | 56.29            | 50.59            | 37.88            | 47.22            | 25.82            | 44.75 | 47.71 | 17.77 | 58.92 | 36.19 | 43.39 |
| 12-EpOME  | 42.48            | 39.97            | 40.25            | 39.62            | 28.97            | 37.42            | 18.43            | 39.5  | 37.97 | 13.78 | 45.2  | 31.38 | 33.56 |
| 12-diHOME | 59.9             | 68.48            | 76.16            | 79.82            | 46.05            | 54.02            | 36.16            | 67.65 | 41.69 | 24.45 | 46.91 | 42.31 | 38.15 |
| 9-diHOME  | 17.17            | 25.45            | 19.18            | 17.67            | 14.8             | 19.7             | 8.48             | 24.64 | 7.44  | 6.95  | 12.6  | 16.75 | 13.51 |

|            |       |       |       |       |       |        |       |       |       |       |       |       |       |
|------------|-------|-------|-------|-------|-------|--------|-------|-------|-------|-------|-------|-------|-------|
| 15-oxoETE  | NA    | 0.65  | NA    | NA    | 0.95  | 0.95   | 0.77  | NA    | 0.9   | NA    | NA    | 0.96  | 0.35  |
| 12-HEPE    | 0.45  | 0.4   | 0.46  | 0.64  | 0.33  | NA     | 0.37  | 0.81  | NA    | 0.43  | NA    | 0.82  | 0.68  |
| 5-oxoETE   | 2.21  | 2.63  | 2.28  | 1.96  | 1.64  | 2.29   | 1.81  | 3.96  | 2.49  | 2.11  | 2.35  | 2.4   | 2.17  |
| 5-HEPE     | 3.29  | 2.85  | 2.92  | 2.51  | 2.33  | 3.61   | 2.31  | 5.05  | 3.43  | 2.7   | 3     | 3.53  | 2.89  |
| 8-HEPE     | 1.36  | 1.21  | 1.4   | 1.21  | 1.01  | 1.41   | 1.11  | 2.43  | 1.53  | 1.3   | 1.44  | 1.47  | 1.33  |
| 14-EpETE   | 4.21  | 3.75  | 4.35  | 3.74  | 3.13  | 4.36   | 3.45  | 7.53  | 4.74  | 4.03  | 4.47  | 4.56  | 4.13  |
| 8-HETE     | NA    | 2.28  | 3.95  | 2.78  | 3     | 3.8    | 0.76  | NA    | 2.13  | NA    | 1.08  | 2.77  | 0.6   |
| 11-EET     | 11.28 | 17.87 | 32.01 | 9.67  | 7.43  | 7.57   | 3.8   | 4.68  | 6.48  | 1.92  | 10.6  | 6.96  | 6.94  |
| 11-HETE    | 54.26 | 77.24 | 89.83 | 89.51 | 60.79 | 125.75 | 28.28 | 78.35 | 69.53 | 24.16 | 79.94 | 74.17 | 43.65 |
| 12-HETE    | 4.56  | 9.11  | 6.12  | 22.69 | 4.08  | 15.86  | 1.11  | 7.24  | 4.62  | 2.09  | 5.86  | 7.92  | 6.15  |
| 9-HETE     | 2.7   | 4.81  | 4.34  | 4.38  | 4.35  | 6.5    | 4.68  | 4.84  | 5.57  | 2.58  | 5.26  | 5.3   | 2.65  |
| 5-HETE     | 13.3  | 14.26 | 16.68 | 12.79 | 11.91 | 19.48  | 6.7   | 7.06  | 8.58  | 5.61  | 10.77 | 10.57 | 9.28  |
| 20-HETE    | 0.18  | 14.23 | 13.54 | 17.42 | 16.09 | 27.56  | NA    | 15.12 | 0.2   | 2.54  | 14.51 | 10.83 | NA    |
| 15-HETE    | 13.57 | 16.88 | 22.57 | 23.83 | 17.02 | 29.95  | 9.08  | 18.28 | 16.86 | 5.97  | NA    | 19.74 | 14.7  |
| 14-EET     | 11.1  | 23.73 | 45.41 | 12.76 | 12.83 | 14.33  | 4.49  | 8.65  | 1.87  | 1.59  | 11.45 | 14    | 7.73  |
| 11-DiHETE  | NA    | 1.3   | NA    | 1.25  | 1     | 1.48   | 1.01  | 2.32  | NA    | 1.19  | NA    | 1.42  | 1.29  |
| LKB4       | 0.8   | NA    | NA    | 0.87  | 0.59  | 0.82   | 0.65  | 1.42  | 0.9   | 0.76  | 0.85  | 1.09  | 0.78  |
| 8-DiHETE   | 1.93  | 1.72  | NA    | 1.71  | 1.44  | 2      | 1.58  | 3.46  | NA    | 1.85  | 2.05  | 2.09  | 1.89  |
| 14-DiHETE  | 0.71  | 0.8   | 0.77  | 0.8   | 0.55  | 0.9    | 0.7   | 1.19  | 0.65  | 0.57  | 0.53  | 0.72  | 0.69  |
| 8-DHET     | 4.18  | 4.77  | 4.3   | 4.01  | 3.37  | 5.29   | 3.13  | 6     | 3.34  | 2.7   | 3.83  | 3.94  | 2.63  |
| 11-DHET    | 5.76  | 7.78  | 6.16  | 6.58  | 5.61  | 10.04  | 3.76  | 9.46  | 3.64  | 2.67  | 4.27  | 5.74  | 4.28  |
| 14-DHET    | 6.54  | 9.57  | 6.36  | 7.42  | 5.56  | 9.46   | 4.52  | 8.88  | 3.91  | 2.54  | 5.82  | 6.69  | 4.23  |
| 7-DPE      | 4.93  | 4.4   | 5.09  | 4.37  | 3.66  | 5.11   | 4.04  | 8.82  | 5.56  | 4.71  | 5.24  | NA    | 4.83  |
| 20-HDHA    | 1.62  | 2.56  | 3.27  | NA    | NA    | NA     | 1.32  | 2.9   | 2.41  | 1.55  | NA    | 3.69  | 1.59  |
| 14-HDHA    | NA    | 11.49 | 3.67  | 16.84 | 2.64  | 28.73  | NA    | 21.89 | NA    | 6.21  | 3.78  | 3.85  | 7.96  |
| 16-HDHA    | 3.96  | 4.93  | 4.97  | 3.75  | 3.01  | 6.42   | 2.45  | 5.91  | 4.49  | 3.39  | 4.27  | 4.66  | 3.16  |
| PGD2       | 3.54  | 3.99  | 1.9   | 4.61  | 2.45  | 5.35   | 1.39  | 10.61 | 7.55  | 0.9   | 15.46 | 6.25  | 2.95  |
| Lipoxin A4 | 0.95  | 0.85  | 0.98  | 0.88  | 0.75  | 0.98   | 0.78  | 1.7   | 1.07  | 0.91  | 1.01  | 1.03  | 0.93  |
| PGE2       | 4.65  | 4.71  | 3.03  | 5.72  | 4.1   | 7.85   | 2.27  | 9.51  | 2.96  | 1.41  | 9.58  | 7.05  | 4.02  |
| PGF2a      | 8.04  | 10.37 | 4.2   | 13.81 | 7.19  | 16.12  | 3.78  | 21.28 | 5.33  | NA    | 17.62 | 10.5  | 10.31 |

|              |      |      |      |      |      |      |      |      |      |      |      |      |      |
|--------------|------|------|------|------|------|------|------|------|------|------|------|------|------|
| 16-DiHDPA    | 3.59 | 3.68 | 4.01 | 5.48 | 3.49 | 6.72 | 2.63 | 7.67 | 3.39 | 2.02 | 3.39 | 4.31 | 2.77 |
| 7-DiHDPA     | 2.74 | 2.38 | 2.44 | 2.1  | 1.76 | 2.45 | 1.94 | 4.58 | 2.67 | 2.26 | 2.52 | 2.56 | NA   |
| 19-DiHDPA    | 2.25 | 2.12 | 2.23 | 1.92 | 1.64 | 2.18 | 1.17 | 2.67 | 1.75 | 1.24 | 1.93 | 1.92 | 1.55 |
| TBx2         | 2.38 | 1.23 | 0.97 | 2.2  | 1.05 | 1.03 | 0.71 | 2.13 | 1.44 | 0.64 | 4.02 | 3.22 | 0.34 |
| Resolvin D1  | 1.33 | 1.18 | 1.37 | 1.18 | 0.98 | 1.37 | 1.09 | 2.37 | 1.49 | 1.27 | 1.41 | 1.44 | 1.3  |
| LKD4         | 1.97 | 1.76 | 2.04 | 1.75 | 1.47 | 2.04 | 1.62 | 3.53 | 2.22 | 1.89 | 2.1  | 2.14 | 1.93 |
| 6-keto-PGF1a | 1.13 | 1.09 | 0.32 | 0.47 | 0.18 | NA   | 0.44 | 0.66 | 0.23 | 0.47 | 1.53 | 1.68 | 0.39 |

**Table S5.** Oxylipid concentrations in lung tissues (ng/gram tissue).

| Sample    | Lung1  | Lung2  | Lung3  | Lung4  | Lung5  | Lung6  | Lung7  | Lung8  | Lung9  | Lung10 | Lung11 | Lung12 | Lung13 | Lung14 | Lung15 | Lung16 | Lung17 | Lung18 | Lung19 |
|-----------|--------|--------|--------|--------|--------|--------|--------|--------|--------|--------|--------|--------|--------|--------|--------|--------|--------|--------|--------|
| Treatment | TiO2   | TiO2   | TiO2   | TiO2   | TiO2   | TiO2   | TiO2   | TiO2   | TiO2   | TiO2   | Air    | Air    | Air    | Air    | Air    | Air    | Air    | Air    | Air    |
| 9-oxoODE  | 102.84 | 62.03  | 83.95  | 70.88  | 70.19  | 62.08  | 49.75  | 101.59 | 62.9   | 87.79  | 61.23  | 68.2   | 58.17  | 99.86  | 50.17  | 50.78  | 38.24  | 65.32  | 55.88  |
| 9-EpOME   | 371.22 | 379.12 | 200.89 | 212.14 | 873.19 | 263.8  | 189.45 | 232.6  | 245.76 | 292.23 | 247.69 | 243.38 | 214.86 | 435.18 | 209.02 | 180.32 | 124.24 | 242.31 | 223.66 |
| 9-HODE    | 418.94 | 328.29 | 163.72 | 260.21 | 742.1  | 191.05 | 130.55 | 230.44 | 184.81 | 243.84 | 273.28 | 248    | 280.53 | 289.57 | 177.49 | 169.95 | 122.13 | 276.74 | 241.8  |
| 13-HODE   | 687.11 | 531.11 | 302.97 | 380.44 | 356.44 | 261.96 | 196.05 | 340.23 | 339.06 | 506.42 | 502.65 | 493.68 | 602.71 | 563.09 | 297.09 | 292.42 | 217.73 | 523.64 | 426.52 |
| 12-EpOME  | 485.6  | 471.33 | 298.88 | 270.95 | 331.46 | 293.04 | 238.09 | 296.68 | 312.98 | 465.92 | 395.65 | 407.6  | 371.04 | 625.85 | 281.04 | 281.41 | 178.21 | 312.67 | 339.89 |
| 12-diHOME | 32.02  | 21.88  | 13     | 14.46  | 20.08  | 19.13  | 19.56  | 18.54  | 28.58  | 21.97  | 19.66  | 59.33  | 15.93  | 64.41  | 24.74  | 14.56  | 15.13  | 20.62  | 23.49  |
| 9-diHOME  | 11.3   | 8.07   | 4.51   | 6.6    | 7.72   | 6.44   | 7.31   | 5.48   | 7.82   | 6.83   | 8      | 20.54  | 5.55   | 24.32  | 9.11   | 5.75   | 3.49   | 6.84   | 5.97   |
| 15-oxoETE | 71.84  | 52.71  | 39.27  | 60.51  | 33     | 33.03  | 26.02  | 71.51  | 31.78  | 61.71  | 43.32  | 44.9   | 45.25  | 65.12  | 40.66  | 38.2   | 21.02  | 36.46  | 39.75  |
| 12-HEPE   | 18.9   | 13.85  | 5.8    | 17.6   | 11.41  | 6.18   | 4.55   | NA     | 13.58  | 11.7   | 9.24   | 16.5   | 18.86  | 14.66  | 6.74   | 10.82  | 4.36   | 8.21   | 9.66   |
| 18-HEPE   | 7.95   | 5.66   | 4.51   | NA     | 4.7    | 3.71   | 3.53   | 6.6    | 3.19   | 9.13   | 4.84   | 4.72   | 4.17   | 8.21   | 5.29   | 3.27   | 2.09   | 5.58   | 3.76   |
| 15-HEPE   | 14.33  | 8.55   | 4.54   | NA     | 5.99   | NA     | 4.65   | 7.2    | 9.17   | 9.38   | 7.72   | 10.88  | 10.36  | 9.98   | 6.28   | 3.98   | 2.2    | 8.51   | 4.67   |
| 5-oxoETE  | 82.49  | 56.14  | 37.35  | 71.83  | 36.4   | 42.02  | 29.11  | 49.75  | 44.59  | 46.18  | 53.49  | 32.28  | 69.21  | 57.42  | 36.44  | 44.19  | 22.73  | 56.03  | 49.07  |
| 5-HEPE    | NA     | 2.58   | 2.72   | 2.95   | 1.91   | NA     | NA     | NA     | NA     | NA     | 2.16   | NA     | 4.55   | 2.61   | 1.12   | 2.07   | 1.29   | NA     | 3.65   |
| 8-HEPE    | 3.2    | 2.96   | NA     | 3.45   | NA     | NA     | NA     | 3.02   | 2.06   | 3.42   | 2.34   | NA     | 1.6    | 3.26   | 1.93   | NA     | 0.98   | 1.3    | NA     |
| 8-HETE    | 43.97  | 38.15  | 21.88  | 43.94  | 34.89  | 32.09  | 17.3   | 31.16  | 30.66  | 37.77  | 34.05  | 20.38  | 25.73  | 36.45  | 26.08  | 18.86  | 9.82   | 36.47  | 19.93  |
| 11-EET    | 5.76   | 5.31   | 7.11   | 6.46   | 4.58   | 5.45   | 5.84   | 7.63   | 4.54   | 6.26   | 4.63   | 4.61   | 4.48   | 5      | 5.82   | 4.75   | 2.67   | 6.9    | 4.62   |
| 11-HETE   | 415.87 | 379.18 | 210.22 | 382.2  | 240.11 | 278.12 | 186.77 | 283.13 | 262.1  | 293.73 | 400.5  | 267.23 | 380.39 | 430    | 228.9  | 239.37 | 121.1  | 308.67 | 236.47 |
| 12-HETE   | 298.24 | 341.09 | 135.43 | 328.83 | 180.29 | 195.1  | 103.77 | 156.56 | 272.64 | 334.77 | 199.31 | 317.04 | 296.04 | 294.36 | 139.25 | 214.56 | 70.79  | 252.16 | 172.96 |



|              |         |         |        |        |        |        |        |        |        |        |         |        |        |         |        |        |        |         |        |
|--------------|---------|---------|--------|--------|--------|--------|--------|--------|--------|--------|---------|--------|--------|---------|--------|--------|--------|---------|--------|
| 9-HETE       | 171.01  | 141.07  | 46.24  | 144.31 | 81.3   | 68.08  | 51.67  | 117.85 | 114.73 | 146.3  | 115.06  | 61.45  | 91.1   | 117.15  | 72.66  | 51.22  | 28.14  | 111.69  | 48.86  |
| 5-HETE       | 217.96  | 148.63  | 167.18 | 189.94 | 97.96  | 97.06  | 64.2   | 121.49 | 112.23 | 148.89 | 116.77  | 74.94  | 278.74 | 159.66  | 84.37  | 114.12 | 62.8   | 146.2   | 175.42 |
| 20-HETE      | 43.74   | 46.26   | 40.3   | 22.38  | 27.89  | 31.45  | 23.59  | 75.16  | 27.89  | 56.25  | 42.79   | 30.23  | 66.88  | 46.46   | 24.68  | 59.33  | 12.07  | 28.15   | 29.82  |
| 15-HETE      | 1310.42 | 1179.13 | 534.14 | 1223.2 | 778.14 | 841.43 | 606.17 | 889.63 | 873.64 | 976.93 | 1054.43 | 741.87 | 996.03 | 1165.08 | 721.64 | 670.14 | 313.64 | 1056.14 | 608.59 |
| 14-EET       | 8.91    | NA      | 7.07   | 7.7    | 4.67   | 4.49   | 3.24   | 5.86   | 4.65   | 7.2    | 5.39    | 5.09   | 5.41   | 5.51    | 5.41   | 5.74   | 3.07   | 8.31    | 4.23   |
| 8-EET        | 13.02   | 4.86    | 6.89   | 11.85  | 5.37   | 6.63   | 8.65   | 10.11  | 7.8    | 10.1   | 7.82    | 6.62   | 7.26   | 7.12    | 9.03   | 8.86   | 5      | 13.45   | 6.77   |
| 11-DiHETE    | NA      | NA      | NA     | NA     | NA     | NA     | NA     | 0      | 0      | 0      | 0.57    | 0.54   | NA     | 0.43    | 0.34   | 0.36   | NA     | NA      | NA     |
| LKB4         | 9.99    | 7.51    | 5.21   | 8.29   | 4.67   | 4.56   | 3.25   | 6.41   | 4.68   | 8.16   | 6.55    | 6.73   | 8.61   | 9.76    | 4.88   | 5.57   | 3.38   | 8.72    | 6.18   |
| 8-DiHETE     | NA      | 1.34    | NA     | 1.3    | 0.97   | NA     | 0.52   | NA     | 0      | 0      | 0.97    | 0.95   | 0.91   | 0.87    | 0.85   | NA     | 0      | 0.74    | 0.86   |
| 14-DiHETE    | NA      | NA      | 0.62   | 0.89   | 0.78   | NA     | 0.39   | 0      | NA     | 0      | NA      | 0.72   | 0.65   | 0.82    | 0.79   | 0.63   | 0.47   | 0.57    | 0.63   |
| 8-DHET       | 11.67   | 9.22    | 5.96   | NA     | 6.43   | 4.57   | 3.52   | 6.36   | 4.3    | 6.02   | 7.76    | 6.03   | 5.04   | 9.94    | 7.84   | 9.17   | 3.17   | 4.76    | 3.97   |
| 11-DHET      | 20.14   | 20.34   | 13.31  | 18.72  | 10.84  | 8.39   | 6.59   | 11.84  | 8.41   | 9.94   | 11.51   | 10.75  | 10.31  | 17.88   | 12.76  | 12.24  | 5.39   | 9.44    | 6.58   |
| 14-DHET      | 22.42   | 20.08   | 13.27  | 18.98  | 10.38  | 9.04   | 7.07   | 13.84  | 9.96   | 13.8   | 12.95   | 11.5   | 13     | 19.39   | 13.91  | 19.38  | 7.22   | 13.6    | 7.9    |
| 4-HDHA       | 20.95   | 17.02   | 8.24   | 17.8   | 10.12  | 10.77  | 6.12   | 11.42  | 7.15   | 10.84  | 10.31   | 7.15   | 8.3    | 9.26    | 9.06   | 6.77   | 3.48   | 11.2    | 5.69   |
| 20-HDHA      | 32.71   | 29.65   | 17.56  | 18.41  | 20.38  | 19.81  | 15.7   | 29.28  | 14.5   | 34.03  | 16.26   | 17.45  | 13.43  | 30.88   | 20.65  | 15.17  | 6.79   | 14.94   | 11.32  |
| 14-HDHA      | 229.36  | 198.82  | 97.28  | 215.83 | 85.67  | 106.07 | 71.72  | 109.27 | 86.2   | 102.5  | 164.06  | 75.99  | 109.27 | 190.1   | 113.19 | 57.24  | 35.31  | 78.64   | 59.02  |
| 17-HDHA      | 9.41    | NA      | 7.2    | 10.17  | 6.98   | 9.66   | 5.61   | 13.7   | 9.34   | 13.22  | 9.07    | 5.69   | 8.53   | NA      | 8.38   | 6.32   | NA     | 10.83   | 4.5    |
| 16-HDHA      | 39.93   | 46.64   | 18.94  | 41.86  | 25.97  | 29.01  | 17.56  | 33.61  | 30.26  | 36.57  | 37.17   | 21.98  | 27.38  | 39.06   | 25.16  | 16.95  | 8.04   | 23.7    | 17.23  |
| PGD2         | 160.93  | 153.24  | 372.94 | 139.9  | 137.36 | 97.91  | 83.34  | 113.65 | 80.81  | 146.71 | 174.11  | 286.56 | 463.13 | 278.24  | 124.94 | 144.6  | 150.22 | 166.88  | 187.29 |
| Lipoxin A4   | 1.54    | 0.85    | 0.6    | 0.88   | 0.77   | 0.43   | 0.33   | 0.57   | 0.65   | 0.7    | 0.73    | 0.58   | 0.51   | 0.78    | 0.51   | 0.48   | 0.28   | 0.76    | 0.58   |
| PGE2         | 131.84  | 155.24  | 111.65 | 105.36 | 99.54  | 83.37  | 68.2   | 108.02 | 82.71  | 92.09  | 99.92   | 93.79  | 151.91 | 125.77  | 87.67  | 95.63  | 53.24  | 121.39  | 87.69  |
| PGF2a        | 95.75   | 98.67   | 55.59  | 61.42  | 48.17  | 55.35  | 45.19  | 65.5   | 44.15  | 64.8   | 68.19   | 50.75  | 71.69  | 97.06   | 51.64  | 58.36  | 34.17  | 57.7    | 60.18  |
| 5-IPF2a-VI   | NA      | 2.25    | 1.65   | 1.98   | 1.33   | 1.22   | NA     | NA     | 1.4    | 1.66   | 1.97    | 1.16   | 1.39   | 1.9     | 1.7    | NA     | NA     | 1.32    | 1.16   |
| 16-DiHDPA    | 3.77    | 3.48    | 2.44   | 2.51   | 2.24   | 1.82   | 1.11   | 2.81   | 1.47   | 2.33   | 2.16    | 2.33   | 2.09   | 3.06    | 2.75   | 2.05   | 0.98   | 1.74    | 1.39   |
| 19-DiHDPA    | 14.96   | 10.04   | 8.47   | 9.21   | 5.91   | 4.85   | 2.31   | 6.99   | 4.99   | 7.37   | 7.35    | 7.02   | 6.82   | 8.14    | 7.84   | 4.94   | 2.62   | 7.97    | 3.83   |
| TBX2         | 82.81   | 90.96   | 126.07 | 57.27  | 44.42  | 81.63  | 43.27  | 72.39  | 54.81  | 81.77  | 48.63   | 44.28  | 151.98 | 73.68   | 77.61  | 111.05 | 27.97  | 31.04   | 62.82  |
| 6-keto-PGF1a | 808.92  | 958.92  | 616.37 | 414.82 | 362.26 | 231.55 | 247.14 | 340.89 | 115.04 | 268.89 | 747.54  | 758.59 | 1027.6 | 694.43  | 349.41 | 847.07 | 679.15 | 523.49  | 832.98 |

Table S6. Oxylipid concentrations in placental tissues (ng/gram tissue).

|           | P1    | P2    | P3     | P4    | P5     | P6    | P7    | P8     | P9    | P10   | P12   | P13   | P14   | P15   | P16   | P17    | P18   | P19   |
|-----------|-------|-------|--------|-------|--------|-------|-------|--------|-------|-------|-------|-------|-------|-------|-------|--------|-------|-------|
|           | TiO2  | TiO2  | TiO2   | TiO2  | TiO2   | TiO2  | TiO2  | TiO2   | TiO2  | TiO2  | Air   | Air   | Air   | Air   | Air   | Air    | Air   | Air   |
| 9-oxoODE  | 11.48 | 9.90  | 13.22  | 10.39 | 12.72  | 8.21  | 13.50 | 11.04  | 9.37  | 6.90  | 10.08 | 12.16 | 13.25 | 10.07 | 16.49 | 18.97  | 11.42 | 10.46 |
| 9-EpOME   | 24.33 | 16.14 | 34.25  | 25.86 | 31.29  | 17.19 | 37.96 | 24.59  | 16.63 | 14.43 | 22.37 | 42.35 | 31.25 | 17.89 | 25.30 | 41.42  | 22.47 | 20.89 |
| 9-HODE    | 21.78 | 14.92 | 41.49  | 27.17 | 32.70  | 20.60 | 33.99 | 26.16  | 16.46 | 12.80 | 20.85 | 38.45 | 29.60 | 24.52 | 21.99 | 41.65  | 22.04 | 23.18 |
| 13-HODE   | 20.64 | 15.19 | 54.18  | 31.40 | 32.63  | 24.29 | 43.36 | 27.82  | 19.84 | 15.04 | 25.87 | 48.47 | 46.44 | 29.21 | 29.17 | 53.76  | 33.49 | 25.74 |
| 12-EpOME  | NA    | 15.50 | 44.96  | 24.87 | 32.27  | 19.10 | 39.58 | 22.43  | 15.59 | 13.18 | 24.77 | 43.17 | 35.09 | 19.14 | 26.70 | 46.28  | 28.47 | 19.21 |
| 12-diHOME | 3.28  | 3.32  | 6.50   | 2.81  | 3.15   | 1.84  | 4.41  | 2.08   | 1.94  | 2.96  | 2.20  | 5.65  | 7.81  | 2.57  | 1.98  | 5.67   | 3.19  | 3.33  |
| 9-diHOME  | 1.78  | 1.71  | 2.86   | 1.64  | 1.56   | 1.38  | 1.97  | 1.36   | 1.14  | 1.59  | 1.88  | 1.99  | 3.42  | 1.61  | 1.28  | 2.36   | 1.75  | 1.91  |
| 15-oxoETE | 4.94  | 4.80  | 5.50   | 3.79  | 5.89   | 3.71  | 5.67  | 5.59   | 3.89  | 2.68  | 6.91  | 6.56  | 3.38  | 4.34  | 5.75  | 10.02  | 4.94  | 5.14  |
| 5-oxoETE  | 14.44 | 11.13 | 10.91  | 12.39 | 13.17  | 11.45 | 11.58 | 15.12  | 8.79  | 7.03  | 10.30 | 14.21 | 12.85 | 9.83  | 17.44 | 16.65  | 12.99 | 10.40 |
| 5-HEPE    | NA    | NA    | 1.77   | 1.62  | 2.00   | 1.86  | NA    | 2.00   | 1.45  | 1.71  | NA    | 1.66  | 2.32  | 1.80  | 1.64  | NA     | 1.91  | 2.33  |
| 8-HEPE    | 0.80  | 1.08  | 0.82   | 0.78  | 0.96   | 0.96  | 0.84  | 0.96   | 0.70  | 0.82  | 1.13  | 0.80  | 1.12  | 0.83  | NA    | 1.06   | 0.92  | 1.12  |
| 14-EpETE  | 2.46  | 3.36  | 2.55   | 2.42  | 2.99   | 2.77  | 2.32  | 2.98   | 2.16  | 2.55  | 3.49  | 2.48  | 3.46  | 2.58  | 2.45  | 3.28   | 2.85  | 3.48  |
| 8-HETE    | 6.37  | 5.87  | 8.75   | 6.61  | 8.60   | 5.56  | 6.07  | 9.73   | 4.97  | 4.21  | 4.95  | 6.85  | 6.94  | 5.20  | 5.22  | 8.51   | 6.34  | 4.91  |
| 11-EET    | 11.65 | 16.77 | 14.87  | 12.26 | 10.54  | 10.69 | 15.60 | 24.35  | 7.65  | 6.77  | 12.99 | 15.10 | 19.10 | 14.94 | 15.82 | 21.76  | 16.56 | 18.72 |
| 11-HETE   | 78.82 | 76.67 | 108.50 | 84.39 | 106.74 | 66.72 | 97.66 | 108.35 | 67.57 | 50.35 | 75.92 | 90.24 | 83.28 | 66.64 | 78.80 | 142.26 | 85.99 | 68.09 |
| 12-HETE   | 26.64 | 18.31 | 40.63  | 30.74 | 41.11  | 24.89 | 27.00 | 32.44  | 27.21 | 15.75 | 52.41 | 38.47 | 22.60 | 29.20 | 34.44 | 44.61  | 29.47 | 21.92 |
| 9-HETE    | 10.63 | 9.42  | 21.33  | 11.77 | 15.47  | 8.51  | 11.97 | 17.83  | 9.67  | 6.67  | 8.60  | 17.28 | 15.37 | 9.09  | 10.18 | 18.53  | 16.51 | 9.36  |
| 5-HETE    | 23.53 | 16.92 | 29.09  | 23.50 | 23.49  | 18.84 | 20.50 | 29.60  | 15.04 | 12.77 | 18.72 | 24.99 | 22.22 | 17.11 | 23.80 | 32.19  | 22.23 | 11.15 |
| 20-HETE   | NA    | 0.14  | 0.11   | NA    | 1.37   | 0.12  | NA    | NA     | 1.35  | 0.11  | NA    | NA    | NA    | 1.76  | 0.10  | 0.14   | NA    | NA    |
| 15-HETE   | 62.20 | 53.93 | 76.73  | 59.85 | 90.65  | 48.54 | 64.63 | 85.56  | 50.42 | 35.36 | 59.29 | 60.10 | 45.03 | 46.15 | 63.77 | 117.07 | 64.84 | 56.25 |
| 14-EET    | 14.18 | 18.42 | 15.39  | 18.54 | 13.50  | 13.37 | 17.03 | 30.37  | 11.42 | 7.93  | 14.75 | 19.58 | 30.42 | 22.55 | 22.76 | 21.67  | 19.07 | 22.19 |
| 8-EET     | 6.05  | 9.18  | 7.13   | 7.40  | 10.19  | 6.89  | 13.89 | 15.35  | 1.94  | 3.62  | 3.30  | 8.33  | 8.02  | 12.03 | 12.45 | 18.40  | 8.27  | 2.98  |
| 11-DiHETE | 0.69  | 0.94  | 0.71   | 0.68  | NA     | 0.79  | 0.67  | 0.83   | 0.60  | 0.71  | 0.98  | 0.73  | NA    | NA    | NA    | 0.92   | 0.80  | 0.97  |
| LKB4      | 0.54  | 0.63  | 1.33   | 0.60  | 0.71   | NA    | 0.78  | NA     | 0.59  | 0.48  | 0.66  | 0.60  | 0.65  | NA    | 2.13  | 2.01   | 1.42  | 1.93  |
| 8-DiHETE  | 1.13  | 1.54  | 1.17   | 1.11  | NA     | NA    | NA    | 1.37   | 0.99  | NA    | 1.60  | NA    | 1.59  | 1.18  | 1.12  | 1.50   | 1.31  | 1.60  |
| 14-DiHETE | 0.29  | 0.40  | 0.30   | 0.29  | 0.35   | 0.33  | 0.28  | 0.35   | 0.26  | NA    | 0.41  | 0.29  | 0.41  | 0.31  | 0.29  | 0.39   | 0.34  | 0.41  |
| 8-DHET    | 1.59  | 2.04  | 1.98   | 1.72  | 2.25   | 1.84  | 1.79  | 2.02   | 1.23  | 1.45  | 2.43  | 1.53  | 2.98  | 2.27  | 1.83  | 3.51   | 2.52  | 2.41  |

|              |       |       |       |       |       |       |       |       |       |       |       |       |       |       |       |       |      |       |
|--------------|-------|-------|-------|-------|-------|-------|-------|-------|-------|-------|-------|-------|-------|-------|-------|-------|------|-------|
| 11-DHET      | 1.45  | 1.82  | 1.60  | 1.43  | 1.78  | 1.50  | 1.63  | 2.08  | 1.28  | 1.32  | 2.05  | 1.77  | 2.41  | 1.73  | 1.89  | 3.31  | 2.21 | 2.39  |
| 14-DHET      | 0.68  | 0.72  | 0.68  | 0.66  | 0.89  | 0.43  | 0.93  | 0.95  | 0.77  | 0.47  | 0.79  | 0.80  | 0.46  | 0.85  | 0.95  | 1.94  | 1.13 | 1.31  |
| 4-HDHA       | 5.82  | 6.04  | 4.88  | 6.32  | 6.99  | 6.14  | 5.38  | 8.16  | 4.22  | 4.06  | 7.42  | 5.17  | 6.71  | 4.99  | 6.75  | 6.46  | 4.46 | 6.39  |
| 20-HDHA      | 2.93  | 4.08  | 4.05  | 4.47  | 6.10  | 3.79  | 5.87  | 5.74  | 3.79  | NA    | 3.16  | 2.19  | 2.76  | 2.41  | 4.98  | 6.30  | 2.93 | NA    |
| 14-HDHA      | 24.51 | 22.05 | 33.44 | 23.37 | 23.78 | 36.49 | 16.38 | 38.58 | 30.50 | 12.72 | 21.55 | 16.78 | 13.37 | 13.50 | 18.43 | 26.59 | 2.41 | 25.67 |
| 17-HDHA      | NA    | 14.40 | 38.43 | 25.27 | 50.48 | 26.38 | NA    | 30.79 | 21.11 | NA    | 27.57 | 22.17 | 29.04 | 15.68 | NA    | 21.11 | NA   | 24.65 |
| 16-HDHA      | 3.28  | NA    | 4.90  | 4.25  | 6.48  | 3.76  | 3.92  | 5.59  | 3.36  | NA    | 5.42  | 4.05  | NA    | 3.39  | 3.39  | 6.42  | 3.87 | 5.11  |
| PGD2         | 1.25  | 0.76  | 0.55  | 0.65  | 1.27  | 0.32  | 0.91  | 0.71  | 0.62  | 0.53  | 1.54  | 1.02  | 1.81  | 0.96  | 1.87  | 2.07  | 1.18 | 0.95  |
| Lipoxin A4   | 0.60  | 0.86  | 0.58  | 0.58  | 0.67  | 0.66  | 0.76  | 0.92  | 0.49  | NA    | 0.94  | 0.60  | 0.91  | 0.77  | 1.09  | 1.10  | 0.69 | 0.79  |
| PGE2         | 3.15  | 2.35  | 2.24  | 1.99  | 2.48  | 1.61  | 2.81  | 2.12  | 1.57  | 1.57  | 4.27  | 2.76  | 4.88  | 2.85  | 5.85  | 5.97  | 3.35 | 3.78  |
| PGF2a        | 1.81  | 1.25  | 1.22  | 1.79  | 2.03  | 0.99  | 3.29  | 1.20  | 1.21  | 1.24  | 2.56  | 1.89  | 2.86  | 1.54  | 3.18  | 4.24  | 1.95 | 2.27  |
| 16-DiHDPA    | 0.16  | 0.20  | 0.16  | 0.08  | 0.26  | 0.17  | 0.20  | 0.24  | 0.18  | 0.08  | 0.11  | 0.20  | 0.11  | 0.21  | 0.20  | 0.34  | 0.22 | 0.11  |
| 7-DiHDPA     | 1.49  | 1.89  | 1.53  | 1.36  | 1.68  | 1.56  | NA    | 1.68  | 1.22  | 1.43  | 1.96  | NA    | 1.94  | 1.45  | 1.38  | 1.84  | 1.60 | 1.96  |
| 19-DiHDPA    | 0.69  | 0.90  | 0.77  | NA    | 0.85  | 0.74  | 0.65  | 0.85  | 0.60  | 0.68  | 0.94  | NA    | 0.97  | 0.68  | 0.74  | 0.89  | NA   | 0.97  |
| TBx2         | 2.25  | 0.96  | 1.32  | 1.22  | 1.57  | 0.74  | 0.50  | 1.55  | 0.66  | 1.07  | 4.61  | 1.55  | 2.02  | 1.28  | 2.52  | 2.15  | 1.23 | 1.52  |
| Resolvin D1  | 0.78  | 1.06  | 0.80  | 0.76  | 0.99  | 0.87  | 0.73  | 0.94  | 0.68  | 0.80  | 1.10  | NA    | 1.09  | 0.81  | 0.77  | 1.03  | 0.90 | 1.10  |
| LKD4         | 1.15  | 1.57  | 1.19  | 1.13  | 1.40  | 1.30  | 1.09  | 1.40  | 1.01  | 1.19  | 1.64  | 1.16  | 1.62  | 1.21  | 1.15  | 1.54  | 1.34 | 1.63  |
| 6-keto-PGF1a | 0.13  | 0.16  | 0.15  | 0.17  | 0.22  | 0.14  | 0.16  | 0.22  | 0.10  | 0.08  | 0.51  | 0.21  | 0.41  | 0.25  | 0.25  | 0.62  | 0.43 | 0.35  |
